# Supplementary material for: Transcriptome-Wide Analysis Reveals a Role for Extracellular Matrix and Integrin Receptor Genes in Otic Neurosensory Differentiation from Human iPSCs
Source: MDPI journal article supplement (doi:10.3390/ijms221910849), 2021-10-07
Supplement: s1 [file s1]

**Supporting Table S1 : Primers for RT-qPCR validation**

| GENE (HUGO ID.) | INFO             | ANNOTATION                                               | TAQMAN ASSAY ID |
|-----------------|------------------|----------------------------------------------------------|-----------------|
| <b>HMGA2</b>    | Target 1         | chromodomain helicase DNA binding protein 7 (HGNC:20626) | Hs04397751_m1   |
| <b>DACH1</b>    | Target 2         | dachshund family transcription factor 1 (HGNC:2663)      | Hs00974297_m1   |
| <b>CHD7</b>     | Target 3         | high mobility group AT-hook 2 (HGNC:5009)                | Hs00215010_m1   |
| <b>BMP7</b>     | Target 4         | bone morphogenetic protein 7 (HGNC:1074)                 | Hs00233476_m1   |
| <b>SOX9</b>     | Target 5         | SRY-box transcription factor 9 (HGNC:11204)              | Hs00165814_m1   |
| <b>SOX2</b>     | Target 6         | SRY-box transcription factor 2 (HGNC:11195)              | Hs01053049_s1   |
| <b>SOX11</b>    | Target 7         | SRY-box transcription factor 11 (HGNC:11191)             | Hs00846583_s1   |
| <b>CYP26B1</b>  | Target 8         | cytochrome P450 family 26 subfamily B member 1           | Hs01011223_m1   |
| <b>RDH10</b>    | Target 9         | retinol dehydrogenase 10 (HGNC:19975)                    | Hs00416907_m1   |
| <b>RAI1</b>     | Target 10        | retinoic acid induced 1 (HGNC:9834)                      | Hs01554690_m1   |
| <b>ITGAV</b>    | Target 11        | integrin subunit alpha V (HGNC:6150)                     | Hs00233808_m1   |
| <b>ITGB4</b>    | Target 12        | integrin subunit beta 4 (HGNC:6158)                      | Hs00236216_m1   |
| <b>NANOG</b>    | Reference D0     | Nanog homeobox (HGNC: 20857)                             | Hs02387400_g1   |
| <b>DLX5</b>     | Reference D6     | Distal-less homeobox 5 (HGNC: 2918)                      | Hs01573641_mH   |
| <b>WNT7B</b>    | Reference D13    | Wingless-type MMTV integration site family, member 7B    | Hs00536497_m1   |
| <b>GAPDH</b>    | Internal control | Glyceraldehyde-3-phosphate dehydrogenase (HGNC: 4141)    | Hs02786624_g1   |

| GENE<br>(HUGO ID.) | INFO             | ANNOTATION                                            | TAQMAN ASSAY ID |
|--------------------|------------------|-------------------------------------------------------|-----------------|
| <b>LUM</b>         | Target 1         | Lumican                                               | Hs00929860_m1   |
| <b>DCN</b>         | Target 2         | Decorin                                               | Hs00754870_s1   |
| <b>DNMT3B</b>      | Target 3         | DNA (cytosine-5-)-methyltransferase 3 beta            | Hs00171876_m1   |
| <b>COL1A2</b>      | Target 4         | Collagen, type I, alpha 2                             | Hs01028956_m1   |
| <b>COL2A1</b>      | Target 5         | Collagen, type II, alpha 1                            | Hs00264051_m1   |
| <b>COL12A1</b>     | Target 6         | Collagen, type XII, alpha 1                           | Hs00189184_m1   |
| <b>COL3A1</b>      | Target 7         | Collagen, type III, alpha 1                           | Hs00943809_m1   |
| <b>COL5A1</b>      | Target 8         | Collagen, type V, alpha 1                             | Hs00609133_m1   |
| <b>KRT8</b>        | Target 9         | Keratin 8                                             | Hs01595539_g1   |
| <b>FN1</b>         | Target 10        | Fibronectin 1                                         | Hs01549976_m1   |
| <b>VIM</b>         | Target 11        | Vimentin                                              | Hs00958111_m1   |
| <b>NANOG</b>       | reference D0     | Nanog homeobox                                        | Hs02387400_g1   |
| <b>DLX5</b>        | reference D6     | Distal-less homeobox 5                                | Hs01573641_mH   |
| <b>WNT7B</b>       | reference D13    | Wingless-type MMTV integration site family, member 7B | Hs00536497_m1   |
| <b>GAPDH</b>       | Internal control | Glyceraldehyde-3-phosphate dehydrogenase              | Hs02786624_g1   |
