# Supplementary material for: Transcriptome-Wide Analysis Reveals a Role for Extracellular Matrix and Integrin Receptor Genes in Otic Neurosensory Differentiation from Human iPSCs
Source: MDPI journal article supplement (doi:10.3390/ijms221910849), 2021-10-07
Supplement: s1 [file s1]

**Table S2. The hosts, dilutions, and sources of primary antibodies used in the study**

| <b>Antibody clone</b> | <b>Localization pattern</b> | <b>Host description</b> | <b>Background</b>                           | <b>Antibody Dilution<br/>Pre-treatment</b> | <b>Supplier Cat. No:</b>  |
|-----------------------|-----------------------------|-------------------------|---------------------------------------------|--------------------------------------------|---------------------------|
| DACH1                 | Nuclear                     | Rabbit polyclonal       | Liu et al, 2015<br>PMID:25940701            | 1:250<br>CC1 standard                      | Proteintech<br>10914-1-AP |
| BMP7                  | Nuclear                     | Mouse monoclonal        | Hsu et al, 2008<br>PMID:18560367            | 1:500<br>CC1 standard                      | R&D System<br>MAB3541     |
| HMGA2                 | Nuclear                     | Rabbit polyclonal       | Li et al, 2020<br>PMID:31966084             | 1:4000<br>CC1 standard                     | Proteintech<br>20795-1-AP |
| CHD7                  | Nuclear                     | Rabbit polyclonal       | Janssen et al,2012<br>PMID:22461308         | 1:100<br>CC1 standard                      | Abcam 117522              |
| COL2A1                | Cytoplasmic                 | Rabbit<br>polyclonal    | Crombrugghe et al,<br>2000<br>PMID:10980415 | 2,5µl/400µl<br>CC1 standard                | Sigma<br>HPA055753        |
| COL9A2                | Cytoplasmic                 | Rabbit<br>polyclonal    | Hartman et al,2015<br>PMID:25852475         | 2,5µl/400µl<br>CC1 standard                | Sigma<br>HPA056316        |
| ITGAV                 | Cytoplasmic                 | Rabbit                  | Morandi et al,2016                          | 2,5µl/400µl                                | Sigma                     |

|                                        |             |                  |                                    |                       |                       |
|----------------------------------------|-------------|------------------|------------------------------------|-----------------------|-----------------------|
|                                        |             | polyclonal       | PMID:27363302                      | CC1 standard          | HPA004856             |
| Neuron specific beta 3 tubulin (TUBB3) | Cytoplasmic | Mouse monoclonal | Sengle et al,2008<br>PMID:18621057 | 1:160<br>CC1 standard | R&D System<br>MAB1195 |
